1 Full title:

2 **Predicting cancer origins with a DNA methylation-based deep neural network**

3 **model**

4 Short title:

5 **DNN model for cancer origin prediction**

6

7 Authors:

8 Chunlei Zheng<sup>1</sup> and Rong Xu<sup>1\*</sup>

9 <sup>1</sup>Department of Population and Quantitative Health Sciences, School of Medicine, Case

10 Western Reserve University, Cleveland, OH, USA

11

12 \*Corresponding to: Rong Xu

13 Email: [rxx@case.edu](mailto:rxx@case.edu) (RX)

14

15

16

17

18

19

20

## 21 **Abstract**

22 Cancer origin determination combined with site-specific treatment of metastatic cancer  
23 patients is critical to improve patient outcomes. Existing pathology and gene expression-based  
24 techniques often have limited performance. In this study, we developed a deep neural network  
25 (DNN)-based classifier for cancer origin prediction using DNA methylation data of 7,339 patients of  
26 18 different cancer origins from The Cancer Genome Atlas (TCGA). This DNN model was  
27 evaluated using four strategies: (1) when evaluated by 10-fold cross-validation, it achieved an  
28 overall specificity of 99.72% (95% CI 99.69%-99.75%) and sensitivity of 92.59% (95% CI 91.87%-  
29 93.30%); (2) when tested on hold-out testing data of 1,468 patients, the model had an overall  
30 specificity of 99.83% and sensitivity of 95.95%; (3) when tested on 143 metastasized cancer patients  
31 (12 cancer origins), the model achieved an overall specificity of 99.47% and sensitivity of 95.95%;  
32 and (4) when tested on an independent dataset of 581 samples (10 cancer origins), the model  
33 achieved overall specificity of 99.91% and sensitivity of 93.43%. Compared to existing pathology  
34 and gene expression-based techniques, the DNA methylation-based DNN classifier showed higher  
35 performance and had the unique advantage of easy implementation in clinical settings.

36

37

38

39

40

41

42

43

44

## 45 **Introduction**

46 Identification of cancer origins is routinely performed in clinical practice as site-specific  
47 treatments improve patient outcomes [1-4]. While some cancer origins are easy to be determined, others  
48 are difficult, especially for metastatic and un-differentiated cancer. Cancer origin determination is  
49 typically carried out with immunohistochemistry panels on the tumor specimen and imaging tests, which  
50 need considerable resources, time, and expense. In addition, pathologic-based procedures have limited  
51 accuracy (66-88%) in determining the origins of metastatic cancer [5-8].

52 Several gene expression- or microRNA-based molecular classifiers have been developed to  
53 identify cancer origin. A k-nearest neighbor classifier based on 92 genes showed an accuracy of 84% in  
54 identifying primary site of metastatic cancer via cross-validation [9]. Pathwork, a commercially available  
55 platform based on similarity score of 1,550 genes between cancer tissue and reference tissue, achieved an  
56 overall sensitivity of 88%, an overall specificity of 99% and an accuracy of 89% in identifying tissue of  
57 origin [10, 11]. A decision-tree classifier based on 48 microRNA showed an accuracy of 85-89% in  
58 identification of cancer primary sites [12, 13], and an updated version, the 64-microRNA based assay,  
59 exhibited an overall sensitivity of 85% [14, 15]. A recent support vector machine-based classifier that  
60 integrated gene expression and histopathology showed an accuracy of 88% in known origins of cancer  
61 samples [16]. All these molecular platforms have shown better performance in identifying tissue of origin  
62 as compared to pathology-based methods. However, gene expression- or microRNA-bases classifiers  
63 need to handle RNA that is unstable and less convenient in clinic settings. In addition, these classifiers  
64 have performance of <90% accuracy, which may further limit their wide adoption in clinical settings.  
65 Hence, it is desirable to develop higher performance prediction tools for cancer origin determination,  
66 which can also be easily implemented in clinical settings.

67 DNA methylation is a process by which methyl groups are added to the DNA molecule and 70-  
68 80% of human genome is methylated [17]. It has been shown that DNA methylation is established in  
69 tissue specific manner during development [18, 19]. Though the genomes of cancer patients exhibit

70 overall demethylation, tissue specific DNA methylation markers might be conserved [19]. Indeed, a  
71 random forest-based cancer origin classifier using DNA methylation was reported to achieve a  
72 performance with 88.6% precision and 97.7% recall in the validation set [20], which demonstrated the  
73 usefulness of methylation data in cancer origin prediction. Recently, deep learning technologies have  
74 rapidly applied to the biomedical field, including protein structure prediction, gene expression regulation,  
75 behavior prediction, disease diagnosis and drug development [21, 22]. Studies show that deep learning-  
76 based models often achieved higher performance than traditional machine learning methods (e.g. random  
77 forest and support vector machine, etc.) in many settings, such as gene expression inference [23],  
78 transcript factor binding prediction [24], protein-protein interaction prediction [25], detection of rare  
79 disease-associated cell subsets [26], variant calling [27], clinic trial outcome prediction [28], among  
80 others. In this study, we trained and robustly evaluated a high-performance cancer origin predictive model  
81 by leveraging the large amount of DNA methylation data available in The Cancer Genome Atlas  
82 (TCGA) and the recent developments in deep neural network learning techniques. We demonstrated that  
83 our model performed better than traditional pathology- or gene expression-based models as well as  
84 methylation-based random forest prediction model.

85

## 86 **Materials and methods**

### 87 **Datasets**

88 DNA methylation data (Illumina human methylation 450k BeadChip) and clinical information of  
89 8,118 patients across 24 tissue types were obtained from in GDC data portal [29] using TCGAbiolink  
90 (Bioconductor package, version 2.5.12) [30]. We excluded six tissue types with less than 100 cases in  
91 TCGA to build robust cancer origin classifier. The final data include DNA methylation data and clinical  
92 information from 7,339 patients of 18 cancer origins. TCGA data were used for both cancer origin  
93 classifier training and evaluation, which were randomly and stratified split into training set (n=4,403),  
94 development set (n=1,468) and test set (n=1,468) (Fig 1).

95 **Fig 1. Distribution of cancer samples in TCGA by tissue of origin.** A total of 7339 patients were  
96 randomly and stratified split into train, dev and test sets according to 60:20:20.

97  
98 In order to evaluate the classifier trained on TCGA dataset using independent data, we obtained  
99 11 DNA methylation datasets (Illumina 450k platform) from Gene Expression Omnibus (GEO) [31]  
100 using GEOquery (Bioconductor package, version 2.42.0) [32]. A total of 581 cancer patients covering 10  
101 cancer origins were obtained and the information for each dataset was described in Table 1.

102

103 **Table 1. Characteristics of GEO datasets**

| <b>GEO ID</b>    | <b>Disease</b>                        | <b>Cancer origin</b>      | <b>Cancer type</b>  | <b>Num. of patients</b> |
|------------------|---------------------------------------|---------------------------|---------------------|-------------------------|
| <b>GSE77871</b>  | Adrenocortical carcinomas             | Adrenal gland             | Primary             | 18                      |
| <b>GSE78751</b>  | Triple negative breast cancer         | Breast                    | Primary, metastatic | 23<br>12                |
| <b>GSE101764</b> | Colorectal cancer                     | Colorectal                | Primary             | 112                     |
| <b>GSE38268</b>  | Head and Neck Squamous Cell Carcinoma | Head and neck             | Primary             | 6                       |
| <b>GSE89852</b>  | hepatocellular carcinomas             | Liver                     | Primary             | 37                      |
| <b>GSE49149</b>  | Pancreatic cancer                     | Pancreas                  | Primary             | 167                     |
| <b>GSE112047</b> | Prostate cancer                       | Prostate                  | Primary             | 31                      |
| <b>GSE38240</b>  | Prostate cancer                       | Prostate                  | Primary, metastatic | 2<br>6                  |
| <b>GSE73549</b>  | Prostate cancer                       | Prostate                  | Metastatic          | 18                      |
| <b>GSE86961</b>  | Papillary thyroid cancer              | Thyroid                   | Primary             | 82                      |
| <b>GSE52955</b>  | Urology cancer                        | Kidney, Bladder, prostate | Primary             | 17, 25, 25              |

104

## 105 **Feature selection**

106 Only the training data (n=4,403) from TCGA were used for feature selection. Currently, Illumina  
107 450K and 27K are two commonly used platforms for genome wide analysis of DNA methylation, which  
108 measure DNA methylation of around 450K and 27K CpG sites respectively. DNA methylation level of

109 CpG site is expressed as beta value using the ratio of intensities between methylated and unmethylated  
110 alleles. Beta value is between 0 and 1 with 0 being unmethylated and 1 fully methylated. To make the  
111 model with good compatibility and also reduce the dimensionality, we firstly reduced CpG sites to 27K  
112 for 450K derived samples. To further remove the noise in the data, we used one-way analysis of variance  
113 (one-way ANOVA) to filter the CpG sites whose beta values are not significantly different ( $p > 0.01$ )  
114 among different tissues. Then we used the Tukey honest test to remove the CpG sites that maximal  
115 differences of their beta values are less than 0.15. The input features used for model building consisted of  
116 DNA methylation from 10,360 CpG sites.

## 117 **Training a deep neural network (DNN) model for cancer origin** 118 **classification**

119 We used DNA methylation data from training set ( $n=4,403$ ) to build a DNN model to predict  
120 cancer origins. Tensorflow [33], an open source framework to facilitate deep learning model training, was  
121 used for this purpose. Four well-established techniques were used to optimize the training process,  
122 including weight initialization by Xavier method [34], Adam optimization [35], learning rate decay and  
123 mini-batch training. Xavier method can efficiently avoid gradient disappearance/explosion that random  
124 initialization may bring. Adam, a combination of Stochastic Gradient Descent with momentum  
125 descent [36] and RMSprop [37], makes training process faster. Exponential learning decay (decay  
126 every 1,000 steps with a base of 0.96) was used to improve model performance. Training was performed  
127 in 128 mini-batch of 30 epochs to efficiently use the data. In addition, three hyperparameters (learning  
128 rate, number of hidden layer and hidden layer unit) were optimized to obtain best performance according  
129 to development set performance (1,468 patients with the same distribution of cancer origins as training  
130 set).

## 131 **Validating and testing DNN-based cancer origin prediction model**

132 We used four strategies to evaluate the performance of the DNN cancer origin classifier: (1)

133 evaluation in the 10-fold cross-validation in training dataset to obtain overall specificity, sensitivity, PPV  
134 and NPV as well as corresponding confidence intervals of this model; (2) evaluation in the hold-out  
135 testing dataset to obtain both the overall model performance and tissue-wise performance; (3) evaluation  
136 in the subset of metastatic cancer samples nested in testing dataset to assess the performance of the model  
137 in predicting the primary sites of metastatic cancer, which are often more difficult to be identified in  
138 clinical practice and more clinically relevant; (4) evaluation in independent datasets from GEO to test the  
139 robustness and generalizability of this DNN model. Metrics including specificity, sensitivity, positive  
140 predictive value (PPV) and negative predictive value (NPV) were reported. Receiver Operating  
141 Characteristic curve (ROC curve) was also calculated for each test data performance.

## 142 **Source code, data availability, and reproducibility**

143 Source code used in this study is publicly available in a Github repository  
144 ([https://github.com/thunder001/Cancer\\_origin\\_prediction](https://github.com/thunder001/Cancer_origin_prediction)). We also shared a Jupyter Notebook to  
145 replicate all the machine learning experiments from data processing, model building and optimization to  
146 model evaluation. To execute this notebook, the environment needs to be firstly created according to a  
147 YAML file available in Github. In addition, we also created a Docker image available in Docker hub  
148 ([https://hub.docker.com/r/thunder001/cancer\\_origin\\_prediction](https://hub.docker.com/r/thunder001/cancer_origin_prediction)), where you can download it and run the  
149 container directly on your computer.

150

## 151 **Results**

### 152 **The overall performance of the DNN-based cancer origin classifier** 153 **in 10-fold cross-validation setting**

154 We used DNA methylation data of 7,339 patients from TCGA across 18 primary tissues to train  
155 and test a DNN-based cancer origin classifier. The sample distribution in different cancer origins were

156 shown in Fig 1. The final DNN architecture consists of one input layer (10,360 neurons), two hidden  
157 layers (64 neurons each layer) and one output layer (18 neurons) that represents 18 cancer origins (Fig 2).

158

159 **Figure 2. Schematic representation of DNN architecture of cancer origin classifier.**

160

161 Evaluated in a 10-fold cross-validation setting, the model achieved an overall precision (positive  
162 predictive value, PPV) of 0.9503 (95% CI:0.9373-0.9633) and recall (sensitivity) of 0.9259 (95%  
163 CI:0.9187-0.9330) respectively. In addition, this model also achieved a high specificity of 0.9972 (95%  
164 CI:0.9969-0.9975) (Table 2).

165

166 **Table 2. DNN model performance using 10-fold cross validation of training data.**

|                             | <b>Mean</b> | <b>SD</b> | <b>CI (95%)</b> |
|-----------------------------|-------------|-----------|-----------------|
| <b>Specificity</b>          | 0.9972      | 0.0001    | 0.9969, 0.9975  |
| <b>Sensitivity (Recall)</b> | 0.9259      | 0.0032    | 0.9187, 0.9330  |
| <b>PPV (Precision)</b>      | 0.9503      | 0.0057    | 0.9373, 0.9633  |
| <b>NPV</b>                  | 0.9973      | 0.0001    | 0.9970, 0.9976  |

167

168

Note: PPV: positive predictive value; NPV: negative predictive value.

169

170 **DNN-based cancer origin classifier shows high performance in**

171 **testing dataset**

172 We tested the classifier using test dataset, which includes 1,468 samples with similar distribution  
173 with training set (Fig 1). Cancer origin classification and a confusion matrix for all samples were shown  
174 in S1 and S2 Tables respectively. Model performance metrics were shown on Table 3. The specificity and  
175 negative predictive value (NPV) in individual cancer origin prediction were consistently higher than 0.99.  
176 The overall precision (PPV) and recall (sensitivity) reached 0.9608 and 0.9595 respectively. For many  
177 cancer tissue origin predictions, including brain, colorectal, prostate, skin, testis, thymus and thyroid, this



178 DNN model achieved a precision of 100% (Table 3) and an average AUC of 0.99 (Fig 3).

179 **Table 3. DNN model performance in test set.**

| <b>CANER ORIGIN</b> | <b>SPECIFICITY</b> | <b>SENSITIVITY<br/>(RECALL)</b> | <b>PPV<br/>(PRECISION)</b> | <b>NPV</b> |
|---------------------|--------------------|---------------------------------|----------------------------|------------|
| <b>AG</b>           | 0.9993             | 0.9787                          | 0.9787                     | 0.9993     |
| <b>BLADDER</b>      | 0.9986             | 0.9878                          | 0.9759                     | 0.9993     |
| <b>BRAIN</b>        | 1.0000             | 1.0000                          | 1.0000                     | 1.0000     |
| <b>BREAST</b>       | 0.9977             | 1.0000                          | 0.9810                     | 1.0000     |
| <b>COLORECTAL</b>   | 1.0000             | 0.9861                          | 1.0000                     | 0.9993     |
| <b>ESOPHAGUS</b>    | 0.9909             | 0.7410                          | 0.7579                     | 0.9902     |
| <b>HN</b>           | 0.9971             | 0.9099                          | 0.9619                     | 0.9927     |
| <b>KIDNEY</b>       | 0.9993             | 1.0000                          | 0.9925                     | 1.0000     |
| <b>LIVER</b>        | 0.9993             | 0.9851                          | 0.9851                     | 0.9993     |
| <b>LUNG</b>         | 0.9984             | 0.9740                          | 0.9894                     | 0.9961     |
| <b>PANCREAS</b>     | 0.9979             | 1.0000                          | 0.9167                     | 1.0000     |
| <b>PROSTATE</b>     | 1.0000             | 1.0000                          | 1.0000                     | 1.0000     |
| <b>SKIN</b>         | 1.0000             | 1.0000                          | 1.0000                     | 1.0000     |
| <b>SOFT TISSUE</b>  | 0.9993             | 0.9825                          | 0.9825                     | 0.9993     |
| <b>STOMACH</b>      | 0.9921             | 0.9375                          | 0.8721                     | 0.9964     |
| <b>TESTIS</b>       | 1.0000             | 1.0000                          | 1.0000                     | 1.0000     |
| <b>THYMUS</b>       | 1.0000             | 0.8889                          | 1.0000                     | 0.9979     |
| <b>THYROID</b>      | 1.0000             | 1.0000                          | 1.0000                     | 1.0000     |
| <b>OVERALL</b>      | 0.9983             | 0.9595                          | 0.9608                     | 0.9983     |

180 Note: PPV: positive predictive value; NPV: negative predictive value; AG: Adrenal Gland; HN: Head  
181 and Neck

182

183 **Fig 3. AUCs for individual cancer origin prediction in TCGA test set.**

184

185 There are some variations in precision and recall in different cancer origin predictions. The  
186 lowest performance occurred in esophagus origin prediction with a precision of 0.7579 and a recall of  
187 0.7410. A total of 10 of 39 esophagus origins were incorrectly predicted as stomach origins (S1 and S2  
188 Tables). Given that esophagus is a broad area, if a tumor is located at the border of stomach and  
189 esophagus, it might be difficult for the classifier to distinguish these two tissues. In addition, tissues from  
190 adjacent regions may have similar methylation profiles so that the methylation-based prediction model  
191 has difficulty in differentiating cancers with adjacent origins (e.g., esophagus vs stomach).

192

## 193 **DNN-based cancer tissue classifier shows high performance in** 194 **determining the origins of metastasized cancers**

195 We evaluated the performance of the classifier in determining the origins of metastatic cancers  
196 that nested in our test data. Our data contained 701 samples from distantly metastasized cancers and 558  
197 of them have been used for model development. We then used remaining 143 samples from 12 cancer  
198 origins with various sample sizes for evaluation (Fig 4A). Cancer origin predictions and corresponding  
199 confusion matrix were shown in S3 and S4 Tables. Model performance metrics and ROC curves were  
200 shown in Table 4 and Fig 4B. Consistently, DNN model showed robust high performance in predicting  
201 metastatic cancer origins.

202

203 **Fig 4. Performance of the DNN-based cancer origin classifier in metastatic cancer samples from**  
204 **TCGA test set.** (A) Distribution of metastatic cancer samples by tissue of origin. (B) AUCs for  
205 individual cancer origin prediction

206 **Table 4. DNN model performance in metastatic cancer samples.**

| <b>CANER ORIGIN</b>  | <b>SPECIFICITY</b> | <b>SENSITIVITY<br/>(RECALL)</b> | <b>PPV<br/>(PRECISION)</b> | <b>NPV</b> |
|----------------------|--------------------|---------------------------------|----------------------------|------------|
| <b>ADRENAL GLAND</b> | 1.0000             | 1.0000                          | 1.0000                     | 1.0000     |
| <b>BLADDER</b>       | 1.0000             | 0.9643                          | 1.0000                     | 0.9914     |
| <b>BREAST</b>        | 0.9929             | 1.0000                          | 0.7500                     | 1.0000     |
| <b>COLORECTAL</b>    | 1.0000             | 1.0000                          | 1.0000                     | 1.0000     |
| <b>ESOPHAGUS</b>     | 0.9504             | 1.0000                          | 0.2222                     | 1.0000     |
| <b>HEAD AND NECK</b> | 1.0000             | 0.8833                          | 1.0000                     | 0.9222     |
| <b>KIDNEY</b>        | 1.0000             | 1.0000                          | 1.0000                     | 1.0000     |
| <b>LIVER</b>         | 0.9929             | 1.0000                          | 0.6667                     | 1.0000     |
| <b>LUNG</b>          | 1.0000             | 0.6667                          | 1.0000                     | 0.9929     |
| <b>PANCREAS</b>      | 1.0000             | 1.0000                          | 1.0000                     | 1.0000     |
| <b>STOMACH</b>       | 1.0000             | 1.0000                          | 1.0000                     | 1.0000     |
| <b>THYROID</b>       | 1.0000             | 1.0000                          | 1.0000                     | 1.0000     |
| <b>OVERALL</b>       | 0.9947             | 0.9595                          | 0.8866                     | 0.9922     |

207 Note: PPV: positive predictive value; NPV: negative predictive value.

208 We noticed that performance metrics in several cancer origin predictions were poor: a precision  
209 of 0.22 for esophagus origin prediction, a precision of 0.67 for liver origin prediction and a recall of 0.67  
210 for lung prediction. The poor performance in these three cancer origin predictions may be due to small  
211 sample size. As mentioned above, metastatic cancer samples comprise only a small subset of test dataset  
212 in TCGA, the majority of which are primary tumors. Only 2, 2 and 3 metastatic cancer samples from  
213 esophagus, liver and lung origin respectively were included in test dataset (Fig 4A). The classifier mis-  
214 classified 6 out of 60 head and neck cancers as esophagus origin and 1 of 3 of lung cancers as liver  
215 cancers (S4 Table). Due to small sample sizes for esophagus, liver and lung cancers, a few mis-  
216 classifications had significant impacts on the precision metrics.

217

## 218 **DNN-based cancer tissue classifier shows high performance in**

### 219 **independent testing datasets**

220 The DNN model was trained using DNA methylation data from TCGA. We then tested it in  
221 independent datasets of 11 data series consisting of 581 tumor samples covering 10 tissue origins  
222 downloaded from Gene Expression Omnibus (GEO). The sample distribution was shown in Fig 5A and  
223 cancer origin predictions were listed in S5 Table. Evaluated using these independent datasets, the DNN  
224 model achieved high performance with an overall precision and recall of 98.69% and 93.43% respectively  
225 (Table 5). High performance was also achieved in individual cancer origin predictions (Table 5) with an  
226 average AUC of 0.99 (Fig 5B). Importantly, the model achieved 100% accuracy in predicting the origins  
227 of metastatic cancers in these datasets, including 24 prostate cancer that metastasized to bone, lymph node  
228 or soft tissue and 12 breast cancer that metastasized to lymph node (see Table 1 for these samples).

229

230 **Fig 5. Performance of the DNN-based cancer origin classifier in GEO dataset.** (A) Distribution of  
231 cancer samples obtained from GEO by tissue of origin. (B) AUCs for individual cancer origin prediction

232

233 **Table 5. DNN model performance using independent cancer samples (GEO)**

| <b>CANER<br/>ORIGIN</b> | <b>SPECIFICITY</b> | <b>SENSITIVITY<br/>(RECALL)</b> | <b>PPV<br/>(PRECISION)</b> | <b>NPV</b> |
|-------------------------|--------------------|---------------------------------|----------------------------|------------|
| <b>ADRENAL GLAND</b>    | 1.0000             | 0.7778                          | 1.0000                     | 0.9929     |
| <b>BLADDER</b>          | 1.0000             | 1.0000                          | 1.0000                     | 1.0000     |
| <b>BREAST</b>           | 0.9963             | 0.9714                          | 0.9444                     | 0.9982     |
| <b>COLORECTAL</b>       | 1.0000             | 0.9643                          | 1.0000                     | 0.9915     |
| <b>HEAD AND NECK</b>    | 1.0000             | 0.8333                          | 1.0000                     | 0.9983     |
| <b>KIDNEY</b>           | 1.0000             | 1.0000                          | 1.0000                     | 1.0000     |
| <b>LIVER</b>            | 0.9945             | 1.0000                          | 0.9250                     | 1.0000     |
| <b>PANCREAS</b>         | 1.0000             | 0.8084                          | 1.0000                     | 0.9283     |
| <b>PROSTATE</b>         | 1.0000             | 1.0000                          | 1.0000                     | 1.0000     |
| <b>THYROID</b>          | 1.0000             | 0.9878                          | 1.0000                     | 0.9980     |
| <b>OVERALL</b>          | 0.9991             | 0.9343                          | 0.9869                     | 0.9907     |

234 Note: PPV: positive predictive value; NPV: negative predictive value.

235

## 236 **Discussion**

237 We developed a deep neural network model to predict the cancer origins based on large amount  
238 of DNA methylation data from 7,339 patients of 18 different cancer origins. By combining DNA  
239 methylation data with deep learning algorithm, our cancer origin classifier achieved high performance as  
240 demonstrated in four different evaluation settings. Compared with Pathwork, a commercially available  
241 cancer origin classifier based on gene expressions [10], our DNN model showed higher precision (95.03%  
242 vs 89.4%) and recall (92.3% vs 87.8%) and comparable specificity (99.7% vs 99.4%). Compared with  
243 DNA methylation-based random forest model, our DNN model achieved higher PPV (precision) (95.03%  
244 in cross validation and 96.08% in test vs 88.6%) and comparable specificity, sensitivity and NPV. In  
245 addition, we showed that our DNN model is highly robust and generalizable as evaluated in an  
246 independent testing dataset of 581 samples (10 cancer origins), with overall specificity of 99.91% and  
247 sensitivity of 93.43%. Therefore, high performance both in primary and metastatic cancer origin  
248 prediction and the potential for easy implementation in clinical setting make the methylation-based DNN  
249 model a promising tool in determining cancer origins.

250 DNA methylation is established in tissue specific manner and conserved during cancer  
251 development [19], which makes DNA methylation profile a very useful feature in cancer origin  
252 prediction. Deep neural networks (DNNs) excels in capturing hierarchical features inherent in many  
253 complicated biological mechanisms. Our study indicates that the trained DNN model may be able to  
254 capture hierarchical patterns of cancer origins from the DNA methylation data. While Interpretation of  
255 deep learning-based models is a rapidly developing field and we expect that our model can be explained  
256 in a meaningful way in the future.

257 Our DNN model has potential in predicting origins of Cancer of Unknown Primary origin (CUP).  
258 CUP is a sub-group of heterogenous metastatic cancer with illusive primary site even after standard  
259 pathological examination [38]. It is estimated that 3-5% metastatic cancers are CUP and the majority of  
260 CUP patients (80%) have poor prognosis with overall survival of 6 -10 months [38]. Identifying primary  
261 site of CUP poses challenges for treatment decisions in clinical practice. Currently, intensive pathologic  
262 examination still leaves 30% of them unidentified [39, 40]. High performance of our DNA methylation-  
263 based DNN model may provide an opportunity in this scenario when pathology-based approach fails.  
264 However, due to the limited CUP data in both TCGA and GEO, we currently are unable to test the DNN  
265 models in predicting the origins of CUP. Our future direction is to collaborate with hospital to collect  
266 DNA methylation data from CUP patients to test our model. One challenge is to obtain the true primary  
267 sites for these patients. Due to unknown property of CUP, true primary sites may be established in later  
268 cancer development [20]. Another is through the post-mortem examination of patients since 75% of  
269 primary sites of CUP were found in autopsy [41].

270 One limitation of this study is that small sizes of metastatic cancers in our data. Two resources of  
271 metastatic cancer were used in this study: TCGA and GEO. TCGA has 701 metastatic cancer samples (12  
272 tissues) with available methylation data from Illumina Human Methylation 450K platform. While the  
273 model achieved an overall specificity of 99.47% and sensitivity of 95.95% in cross-validation using  
274 TCGA data, we were unable to robustly test it using independent dataset since methylation data of  
275 metastatic cancers is limited in GEO. Further independent validation of our DNN-based model in

276 predicting origins of metastatic cancers, especially poorly differentiated or undifferentiated metastatic  
277 cancer samples, is needed.

278

## 279 **References**

- 280 1. Hainsworth JD, Rubin MS, Spigel DR, Boccia RV, Raby S, Quinn R, et al. Molecular gene  
281 expression profiling to predict the tissue of origin and direct site-specific therapy in patients with  
282 carcinoma of unknown primary site: a prospective trial of the Sarah Cannon research institute. *J Clin*  
283 *Oncol* 2013. 10;31:217-23.
- 284 2. Varadhachary GR, Raber MN, Matamoros A, Abbruzzese JL. Carcinoma of unknown primary with a  
285 colon-cancer profile-changing paradigm and emerging definitions. *Lancet Oncol*. 2008;9:596–9.
- 286 3. Varadhachary GR, Spector Y, Abbruzzese JL, Rosenwald S, Wang H, Aharonov R, et al. Prospective  
287 gene signature study using microRNA to identify the tissue of origin in patients with carcinoma of  
288 unknown primary. *Clin Cancer Res*. 2011;17:4063-70.
- 289 4. Varadhachary GR, Karanth S, Qiao W, Carlson HR, Raber MN, Hainsworth JD, et al. Carcinoma of  
290 unknown primary with gastrointestinal profile: immunohistochemistry and survival data for this  
291 favorable subset. *Int J Clin Oncol*. 2014;19:479-84.
- 292 5. Brown RW, Campagna LB, Dunn JK, Cagle PT. Immunohistochemical identification of tumor  
293 markers in metastatic adenocarcinoma. A diagnostic adjunct in the determination of primary site. *Am*  
294 *J Clin Pathol*. 1997;107:12-9.
- 295 6. DeYoung BR, Wick MR. Immunohistologic evaluation of metastatic carcinomas of unknown origin:  
296 an algorithmic approach. *Semin Diagn Pathol*. 2000;17:184-93.
- 297 7. Dennis JL, Hvidsten TR, Wit EC, Komorowski J, Bell AK, Downie I, et al. Markers of  
298 adenocarcinoma characteristic of the site of origin: development of a diagnostic algorithm. *Clin*  
299 *Cancer Res*. 2005;11:3766-72.
- 300 8. Park SY, Kim BH, Kim JH, Lee S, Kang GH. Panels of immunohistochemical markers help

- 301 determine primary sites of metastatic adenocarcinoma. *Arch Pathol Lab Med.* 2007;131:1561-7
- 302 9. Ma XJ, Patel R, Wang X, Salunga R, Murage J, Desai R, et al. Molecular classification of human  
303 cancers using a 92-gene real-time quantitative polymerase chain reaction assay. *Arch Pathol Lab*  
304 *Med.* 2006;130:465–73.
- 305 10. Monzon FA, Lyons-Weiler M, Buturovic LJ, Rigl CT, Henner WD, Sciulli C, et al. Multicenter  
306 validation of a 1,550-gene expression profile for identification of tumor tissue of origin. *J Clin Oncol.*  
307 2009;27:2503–8.
- 308 11. Pillai R, Deeter R, Rigl CT, Nystrom JS, Miller MH, Buturovic L, et al. Validation and  
309 reproducibility of a microarray-based gene expression test for tumor identification in formalin-fixed,  
310 paraffin-embedded specimens. *J Mol Diagn.* 2011;13:48-56.
- 311 12. Rosenfeld N, Aharonov R, Meiri E, Rosenwald S, Spector Y, Zepeniuk M, et al. MicroRNAs  
312 accurately identify cancer tissue origin. *Nat Biotechnol.* 2008;26:462–9.
- 313 13. Rosenwald S, Gilad S, Benjamin S, Lebanony D, Dromi N, Faerman A, et al. Validation of a  
314 microRNA-based qRT-PCR test for accurate identification of tumor tissue origin. *Mod Pathol*  
315 2010;23:814–23.
- 316 14. Meiri E, Mueller WC, Rosenwald S, Zepeniuk M, Klinke E, Edmonston TB, et al. A second-  
317 generation microRNA-based assay for diagnosing tumor tissue origin. *Oncologist.* 2012;17:801–12
- 318 15. Pentheroudakis G, Pavlidis N, Fountzilias G, Krikelis D, Goussia A, Stoyianni A, et al. Novel  
319 microRNA-based assay demonstrates 92% agreement with diagnosis based on clinicopathologic and  
320 management data in a cohort of patients with carcinoma of unknown primary. *Mol Cancer.*  
321 2013;12:57.
- 322 16. Tothill RW, Shi F, Paiman L, Bedo J, Kowalczyk A, Mileshekin L, et al. Development and validation  
323 of a gene expression tumour classifier for cancer of unknown primary. *Pathology.* 2015;47:7–12.
- 324 17. Kulis M, Esteller M. DNA methylation and cancer. *Adv Genet.* 2010;70:27–56.
- 325 18. Ohgane J, Yagi S, Shiota K. Epigenetics: the DNA methylation profile of tissue-dependent and  
326 differentially methylated regions in cells. *Placenta.* 2008;29 Suppl A:S29–35.

- 327 19. Fernandez AF, Assenov Y, Martin-Subero JI, Balint B, Siebert R, Taniguchi H, et al. A DNA  
328 methylation fingerprint of 1628 human samples. *Genome Res.* A DNA methylation fingerprint of  
329 1628 human samples. *Genome Res.* 2012;22:407–19.
- 330 20. Moran S, Martínez-Cardús A, Sayols S, Musulén E, Balañá C, Estival-Gonzalez A, et al. Epigenetic  
331 profiling to classify cancer of unknown primary: a multicentre, retrospective analysis. *Lancet Oncol.*  
332 2016;17:1386–1395.
- 333 21. Min S, Lee B, Yoon S. Deep learning in bioinformatics. *Brief Bioinform.* 2017;18:851–869
- 334 22. Ching T, Himmelstein DS, Beaulieu-Jones BK, Kalinin AA, Do BT, Way GP, et al. Opportunities  
335 and obstacles for deep learning in biology and medicine. *J R Soc Interface.* 2018;15(141). doi:  
336 10.1098/rsif.2017.0387
- 337 23. Chen Y, Li Y, Narayan R, Subramanian A, Xie X. Gene expression inference with deep learning.  
338 *Bioinformatics.* 2016;32(12):1832-9.
- 339 24. Alipanahi B, Delong A, Weirauch MT, Frey BJ. Predicting the sequence specificities of DNA- and  
340 RNA-binding proteins by deep learning. *Nat Biotechnol.* 2015;33(8):831-8
- 341 25. Du T, Liao L, Wu CH, Sun B. Prediction of residue-residue contact matrix for protein-protein  
342 interaction with Fisher score features and deep learning. *Methods.* 2016;110:97-105
- 343 26. Arvaniti E, Claassen M. Sensitive detection of rare disease-associated cell subsets via representation  
344 learning. *Nat Commun.* 2017;8:14825. doi: 10.1038/ncomms14825.
- 345 27. Poplin R, Chang PC, Alexander D, Schwartz S, Colthurst T, Ku A, et al. A universal SNP and small-  
346 indel variant caller using deep neural networks. *Nat Biotechnol.* 2018;36(10):983-987
- 347 28. Artemov AV, Putin E, Vanhaelen Q, Aliper A, Ozerov IV, Zhavoronkov A, et al. Integrated deep  
348 learned transcriptomic and structure-based predictor of clinical trials outcomes. *BioRxiv [Preprint].*  
349 2016. (doi:10.1101/095653)
- 350 29. GDC data portal. <https://portal.gdc.cancer.gov>. Accessed 7 August 2019
- 351 30. Colaprico A, Silva TC, Olsen C, Garofano L, Cava C, Garolini D, et al. TCGAbiolinks: a  
352 R/Bioconductor package for integrative analysis of TCGA data. *Nucleic Acids Res.* 2016;44:e71



- 353 31. Gene Expression Omnibus. <https://www.ncbi.nlm.nih.gov/geo/>. Accessed 7 August 2019
- 354 32. Davis S, Meltzer PS. GEOquery: a bridge between the Gene Expression Omnibus (GEO) and  
355 BioConductor. *Bioinformatics*. 2007;23:1846–7
- 356 33. Abadi M, Agarwal A, Barham P, Brevdo E, Chen Z, Citro C, et al. TensorFlow: Large-scale machine  
357 learning on heterogeneous systems. In: *OSDI'16 Proceedings of the 12th USENIX conference on*  
358 *Operating Systems Design and Implementation*. 2016;265-283
- 359 34. Glorot X, Bengio Y. Understanding the difficulty of training deep feedforward neural networks. In:  
360 *Proceedings of the International Conference on Artificial Intelligence and Statistics*. 2010;249-256
- 361 35. Diederik P. Kingma and Jimmy Lei Ba. Adam. A method for stochastic optimization. arXiv.  
362 2014;1412.6980v9
- 363 36. Qian N. On the momentum term in gradient descent learning algorithms. *Neural Netw*. 1999;12:145-  
364 151.
- 365 37. McMahan HB and Streeter M. Delay-Tolerant Algorithms for Asynchronous Distributed Online  
366 Learning. *Advances in Neural Information Processing Systems (Proceedings of NIPS)*. 2014;1–9.
- 367 38. Varadhachary GR, Raber MN. Cancer of unknown primary site. *N Engl J Med*. 2014;371:757–65
- 368 39. Krämer A, Hübner G, Schneeweiss A, Folprecht G, Neben K. Carcinoma of Unknown Primary - an  
369 Orphan Disease? *Breast Care (Basel)*. 2008;3:164-170.
- 370 40. Ettinger DS, Agulnik M, Cates JM, Cristea M, Denlinger CS, Eaton KD, et al. NCCN Clinical  
371 Practice Guidelines Occult primary. *J Natl Compr Canc Netw*. 2011;9:1358-95.
- 372 41. Pentheroudakis G, Golfopoulos V, Pavlidis N. Switching benchmarks in cancer of unknown  
373 primary: from autopsy to microarray. *Eur J Cancer*. 2007;43:2026–36

374

375

376

## 377 **Supporting information**

378 **S1 Table. Cancer origin predictions for 1468 patient samples from TCGA.**  
379 **(DOCX)**

380  
381 **S2 Table. Confusion matrix for TCGA test set predictions.**  
382 **(CSV)**

383 **S3 Table. Cancer tissue origin predictions for 143 metastatic cancer samples.**  
384 **(DOCX)**

385  
386 **S4 Table. Confusion matrix for metastatic cancer samples in TCGA test set.**  
387 **(CSV)**

388 **S5 Table. Cancer origin predictions for 581 samples from GEO datasets.**  
389 **(DOCX)**

390 **S6 Table. Confusion matrix for GEO sample predictions.**  
391 **(CSV)**

# Figure 1

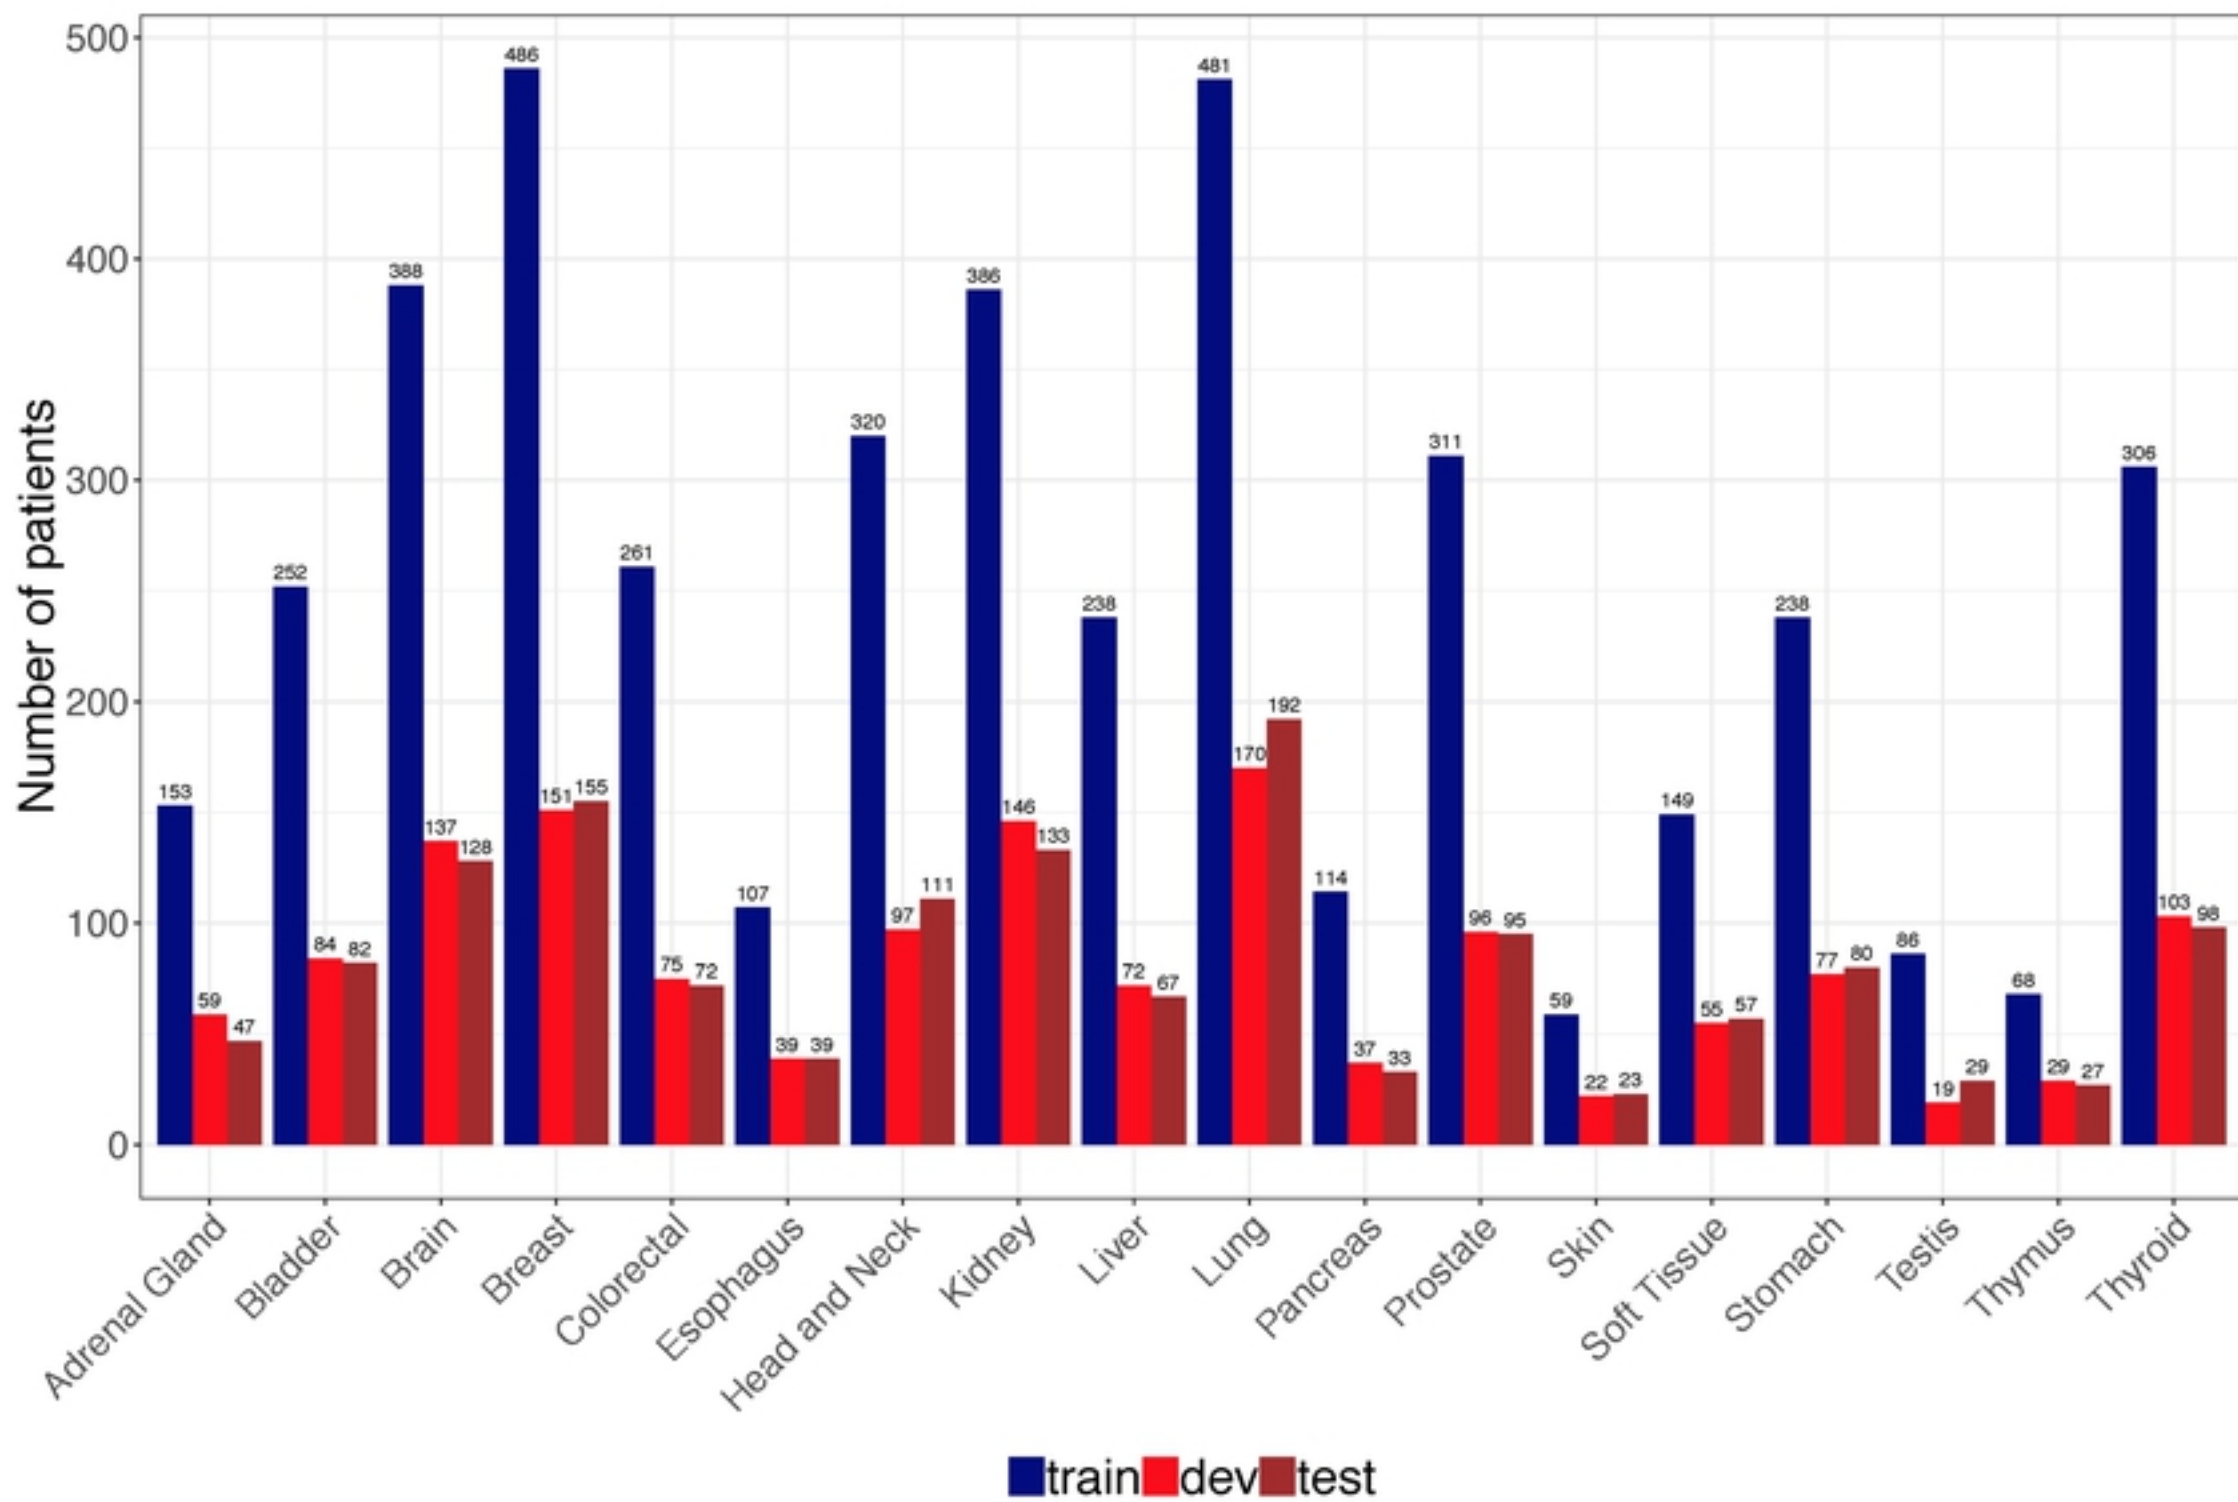

Figure 2

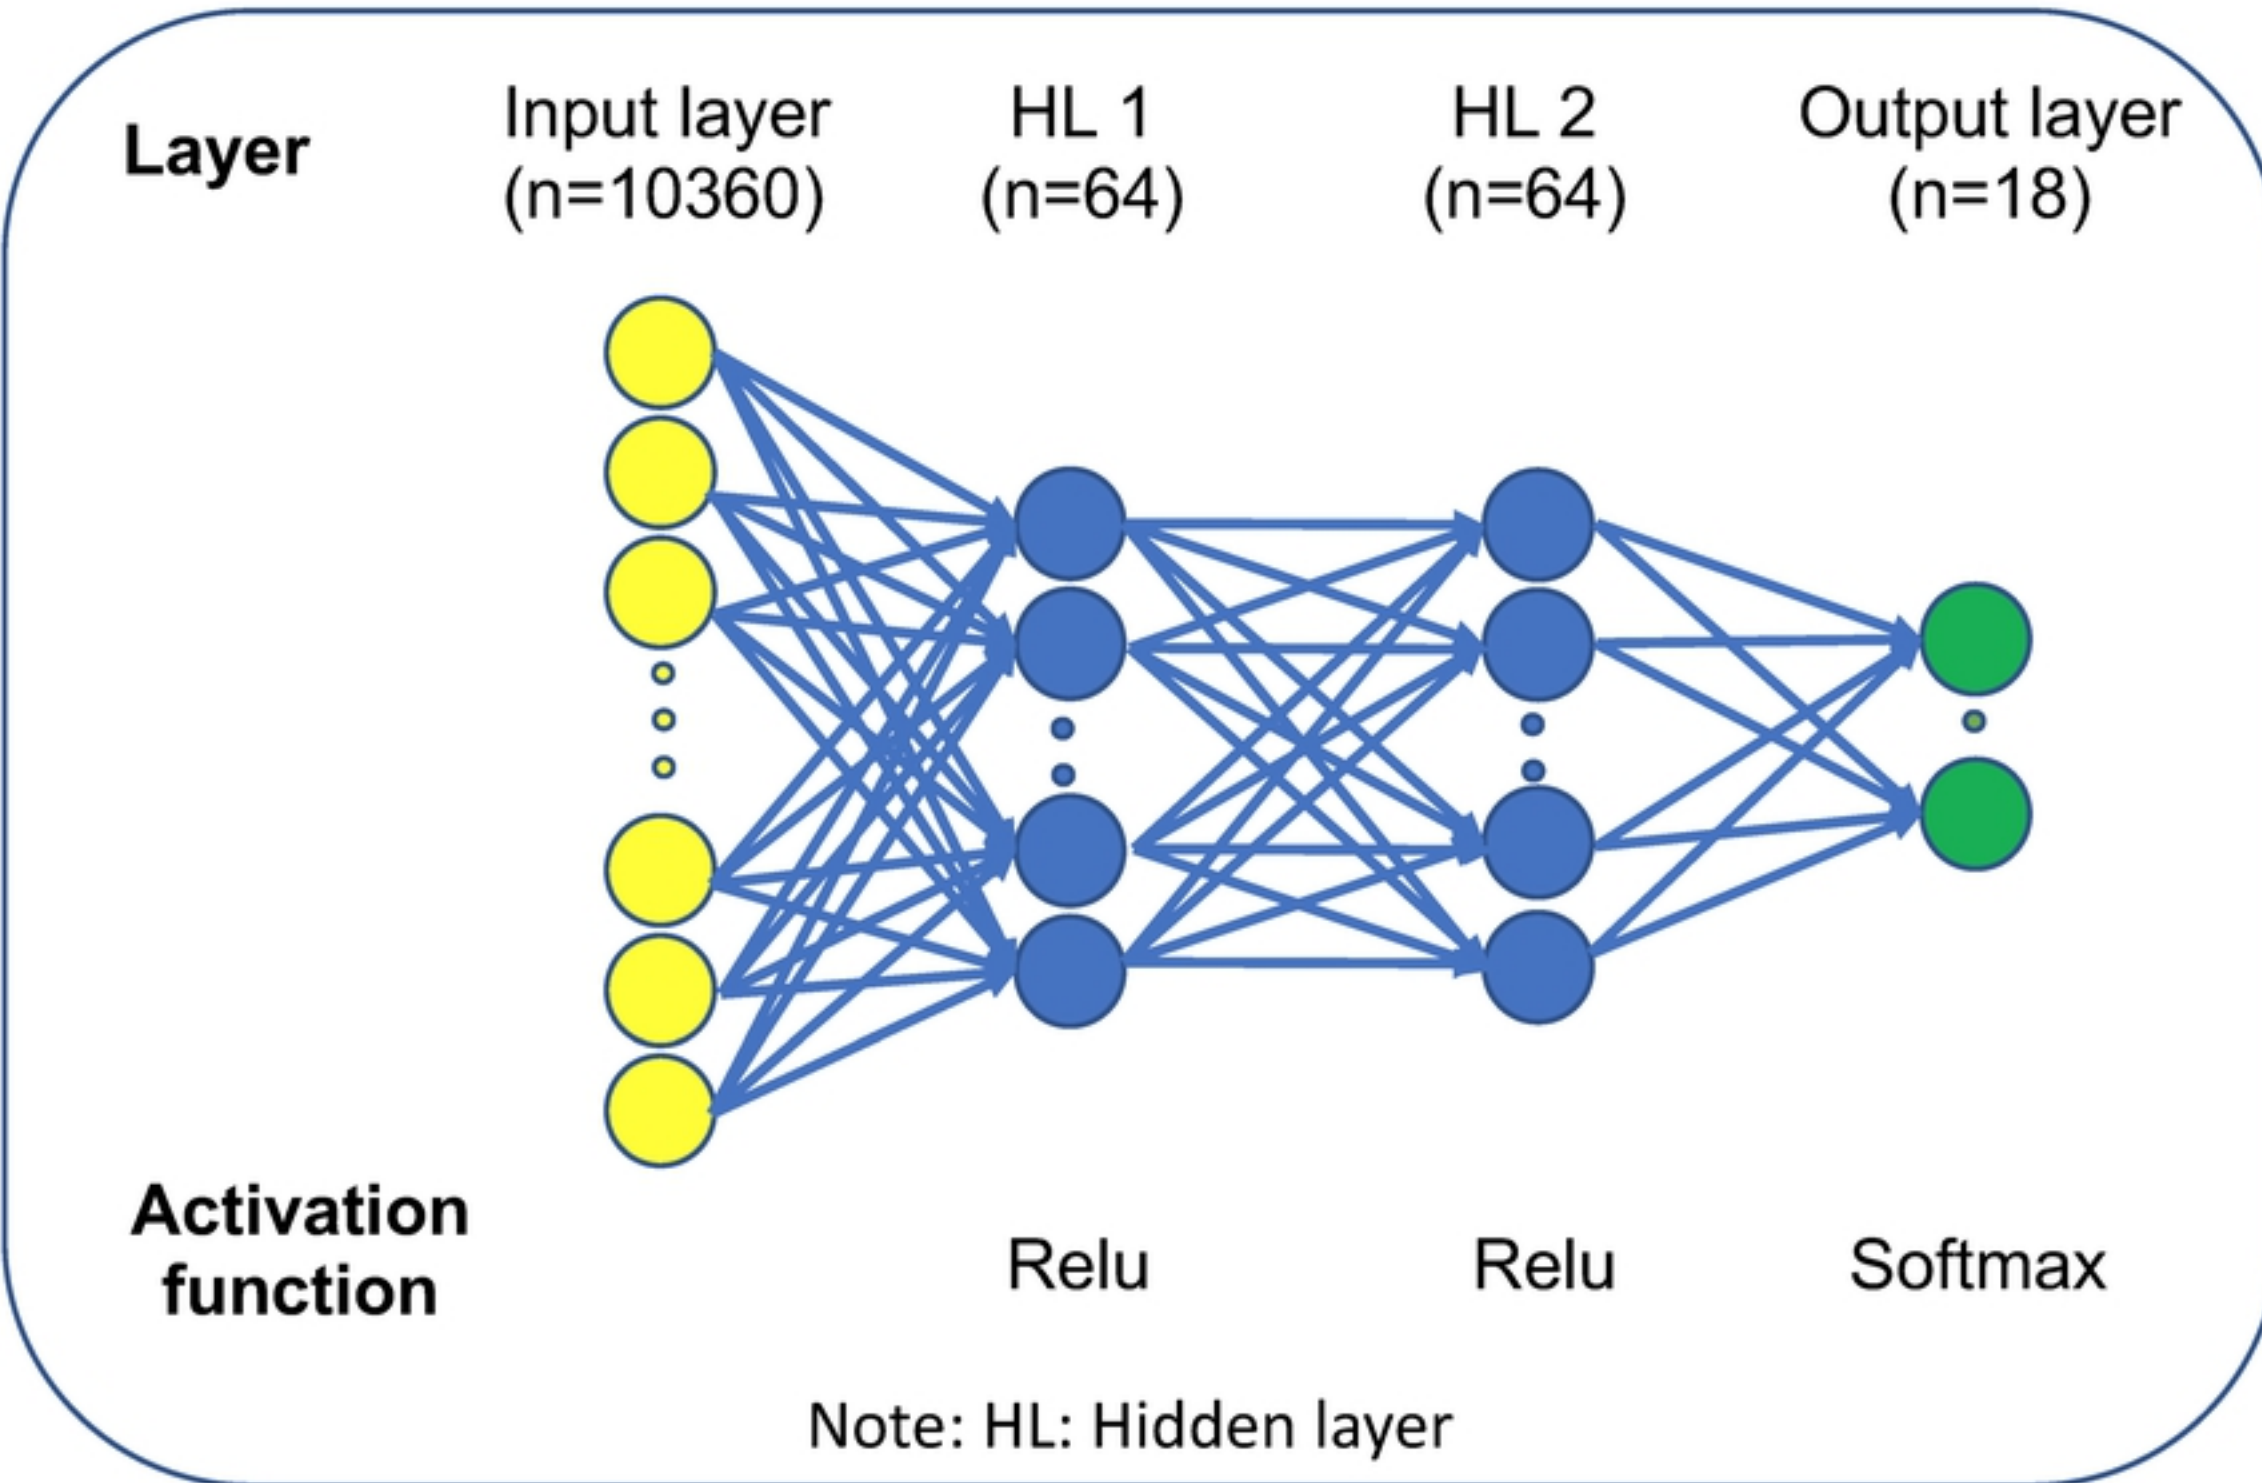

Figure 3

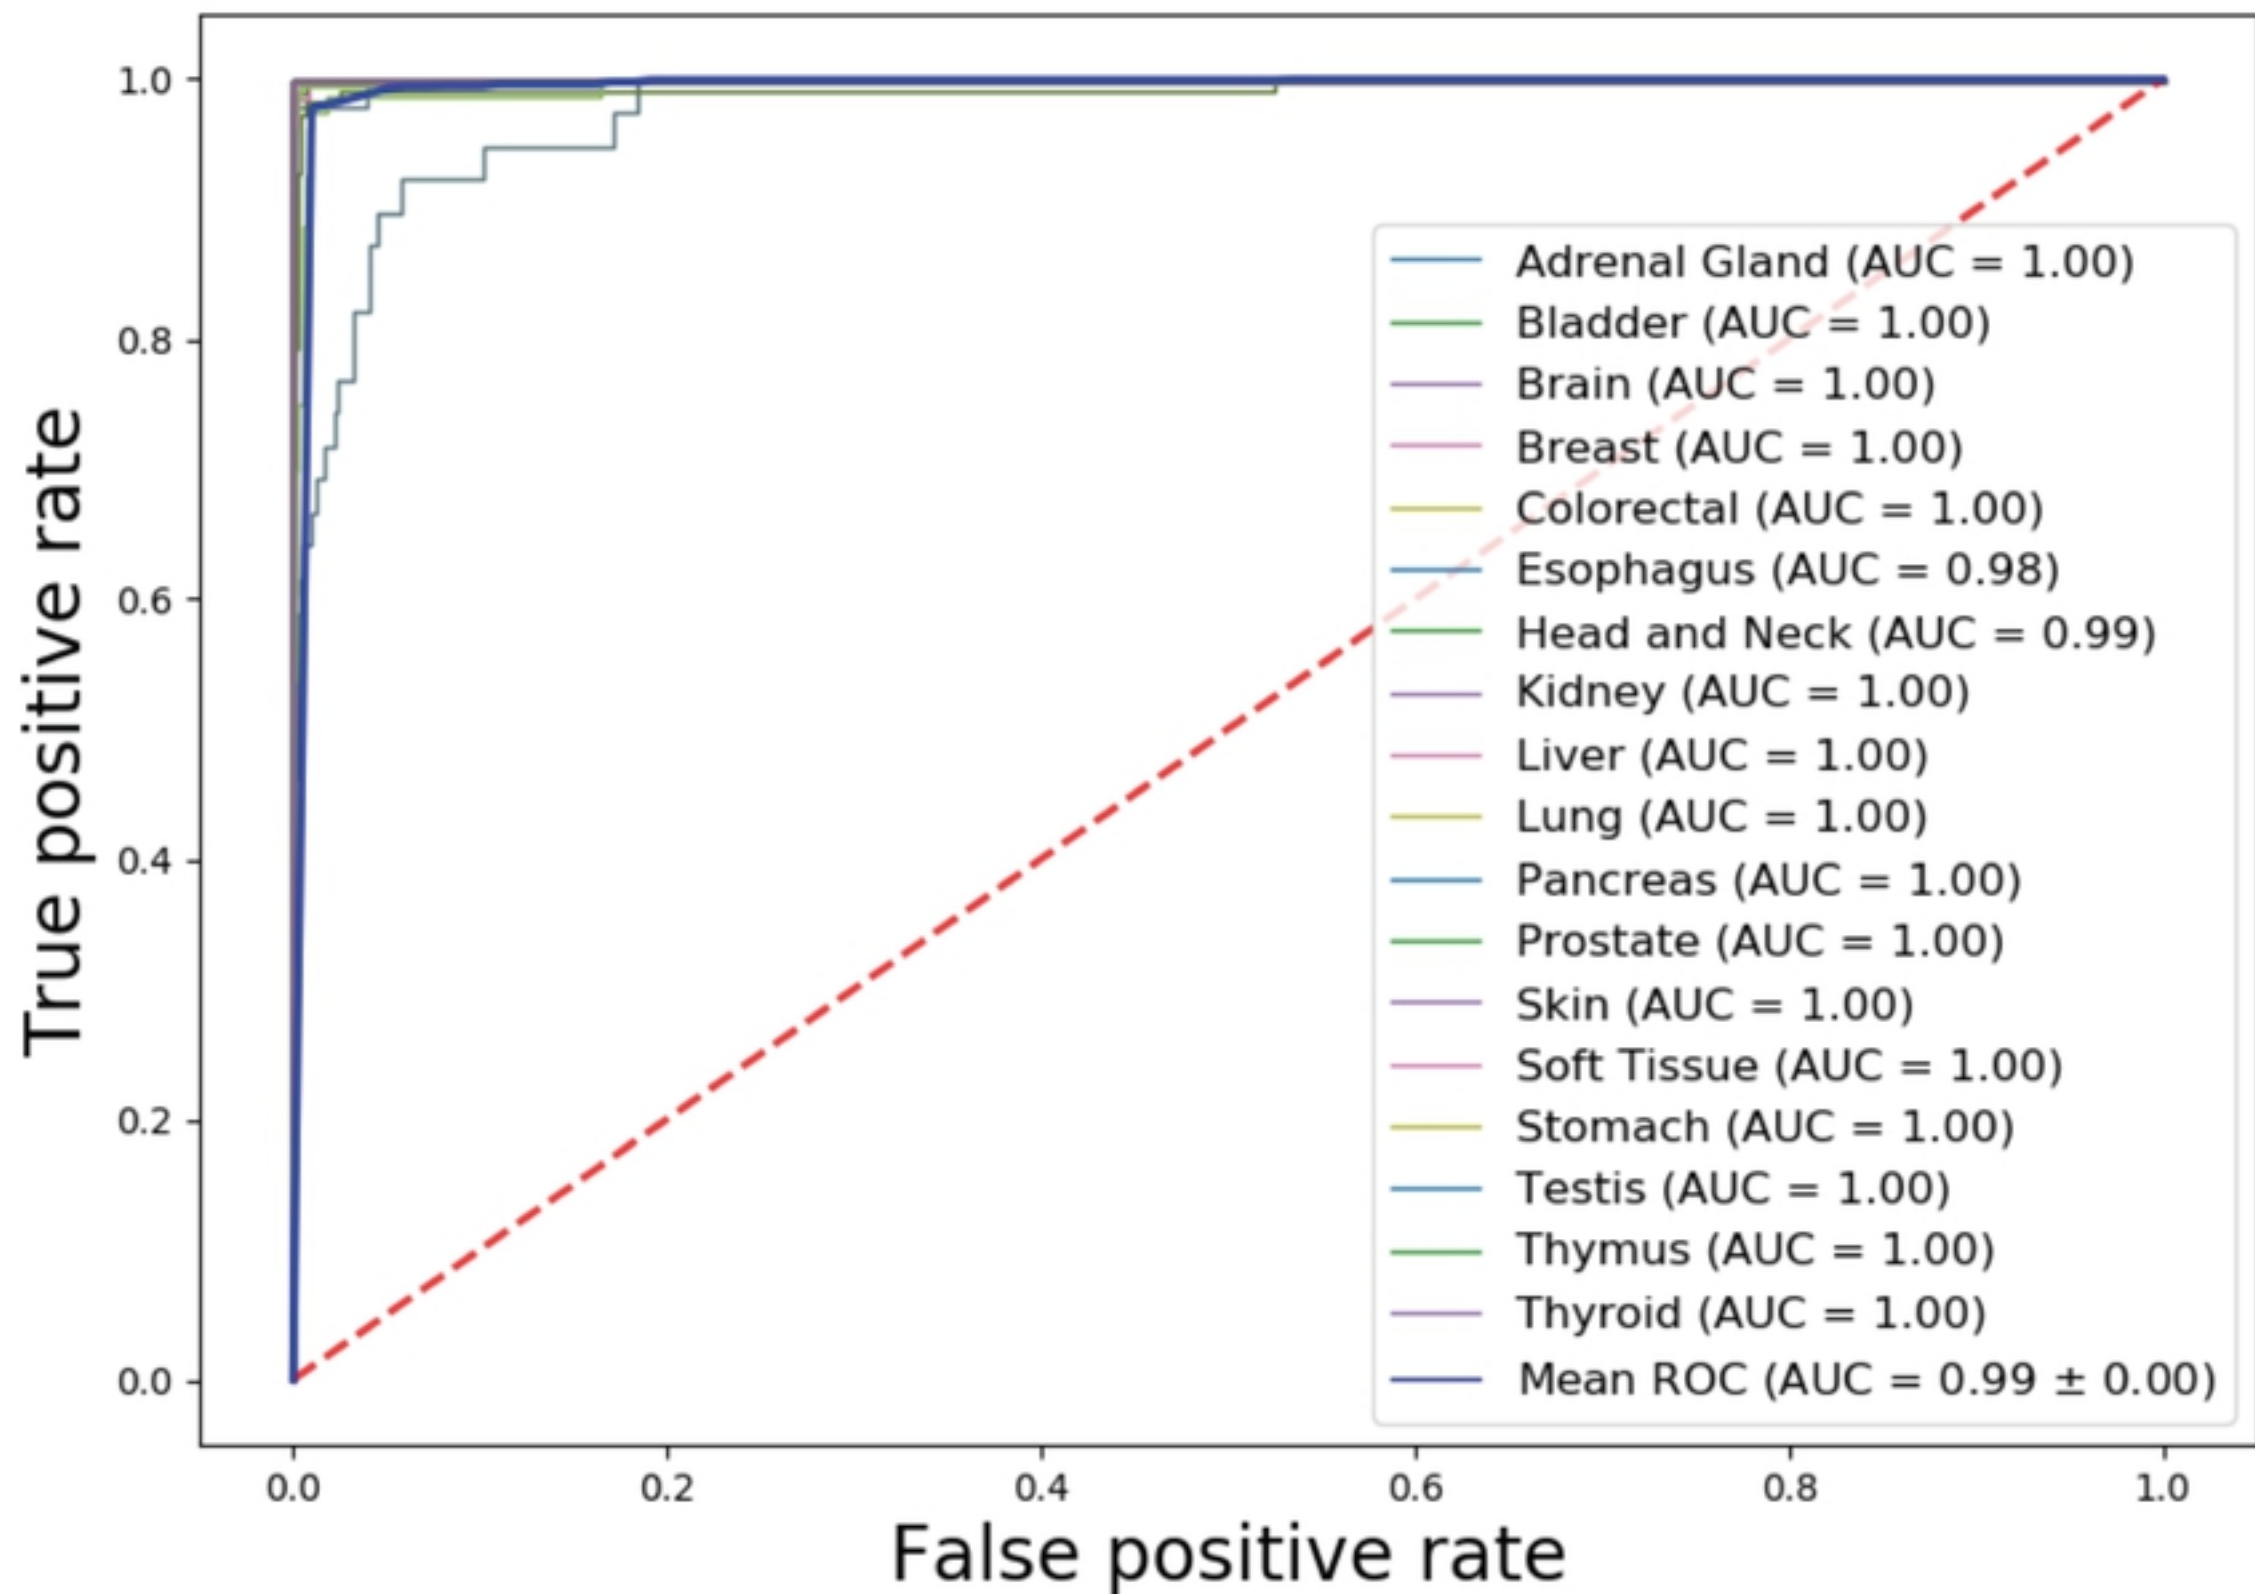

Figure 4

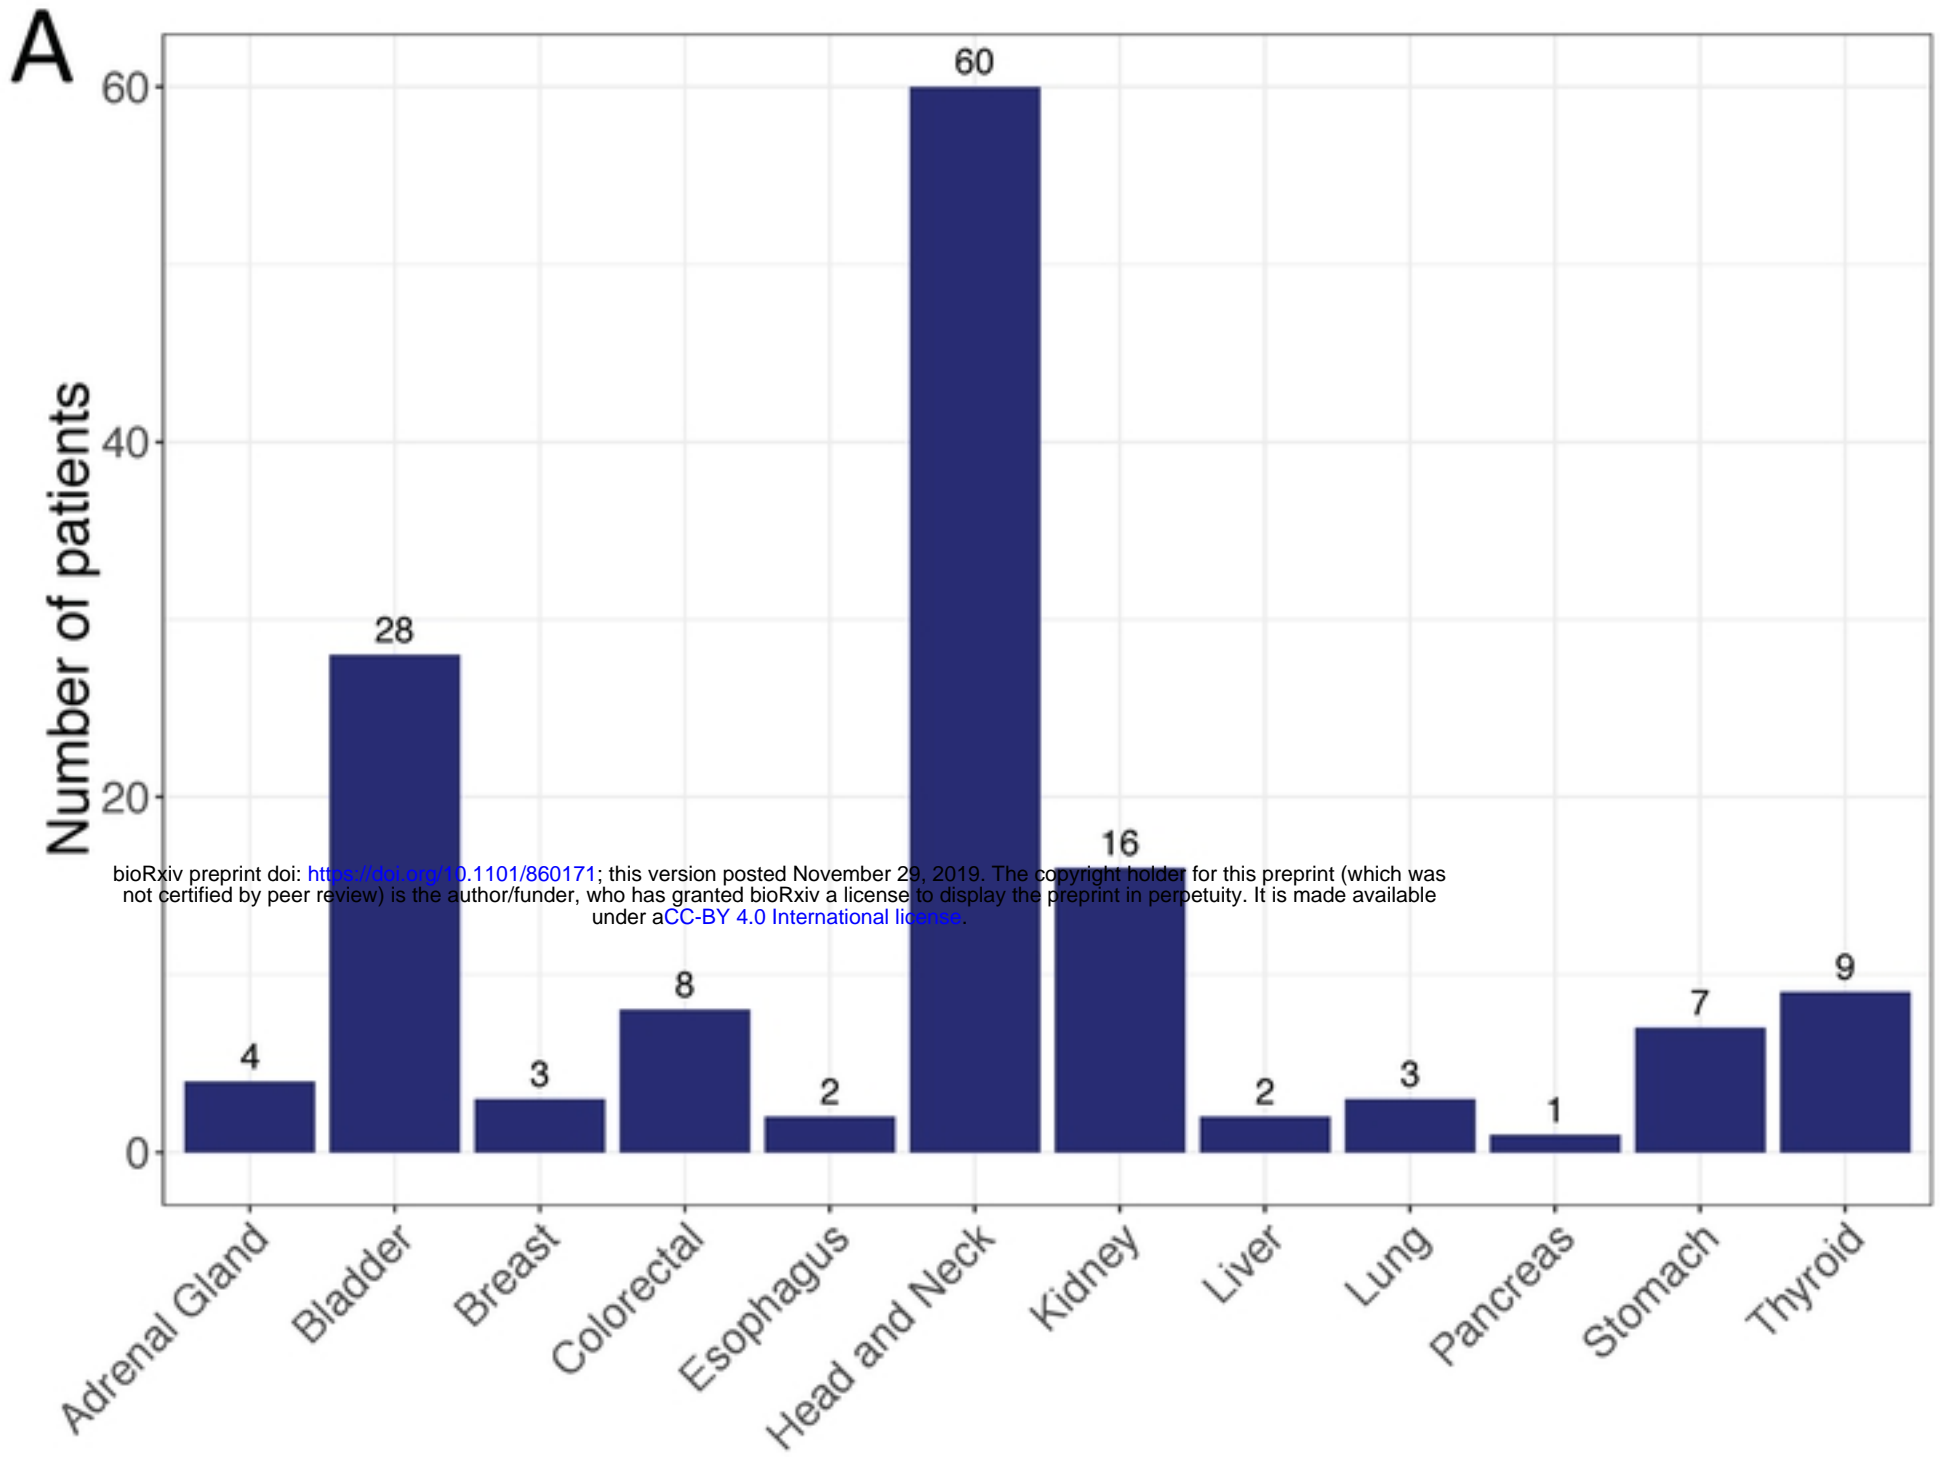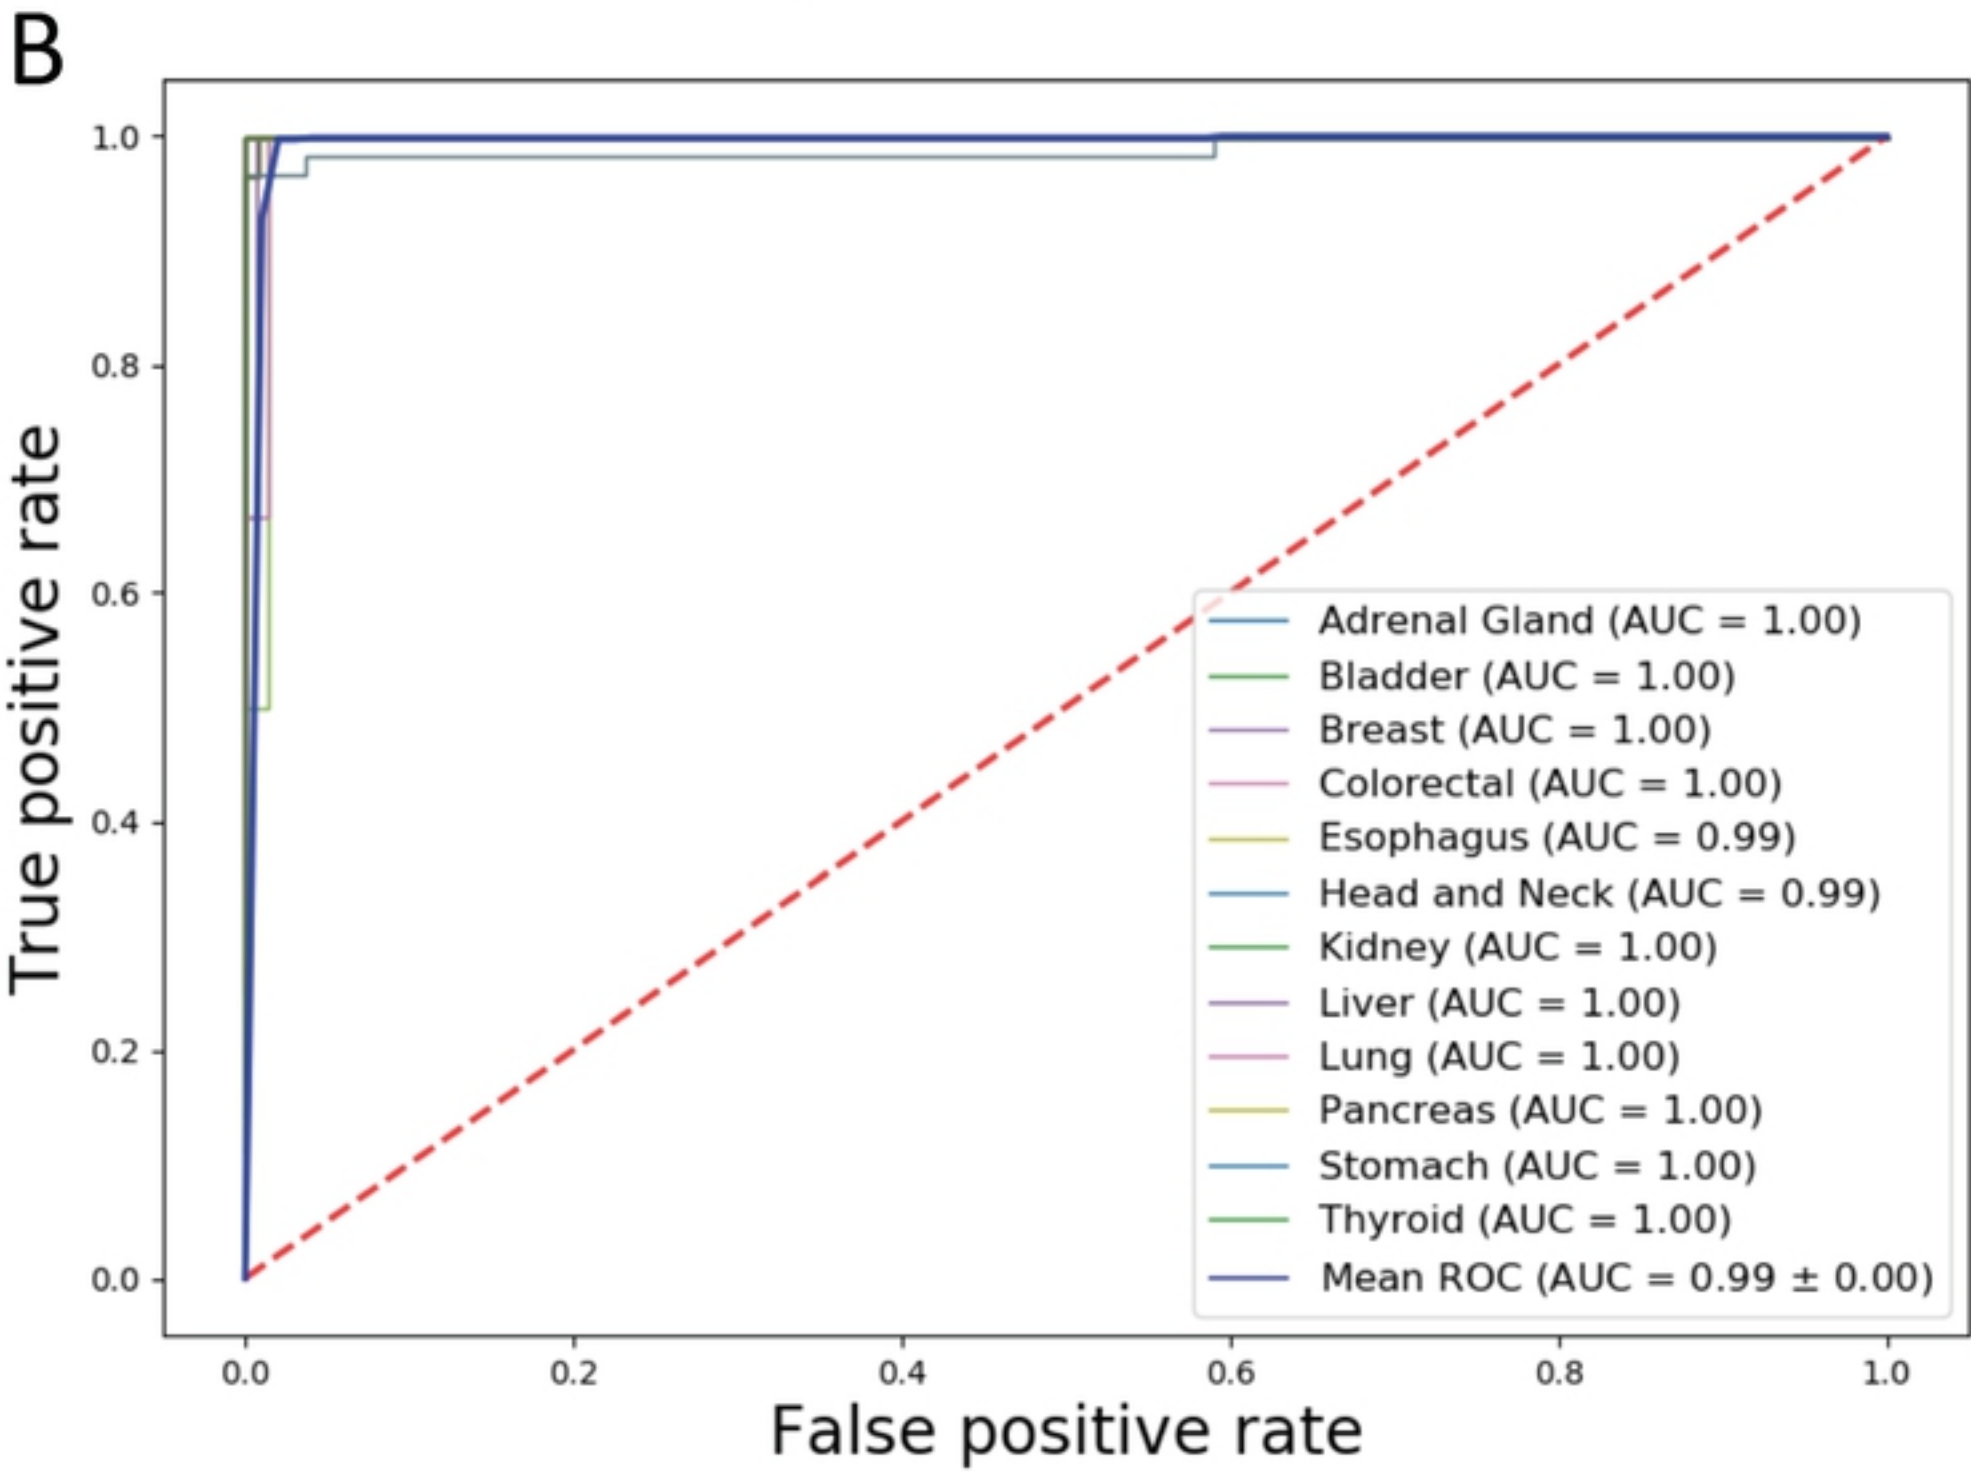



# Figure 5

## A

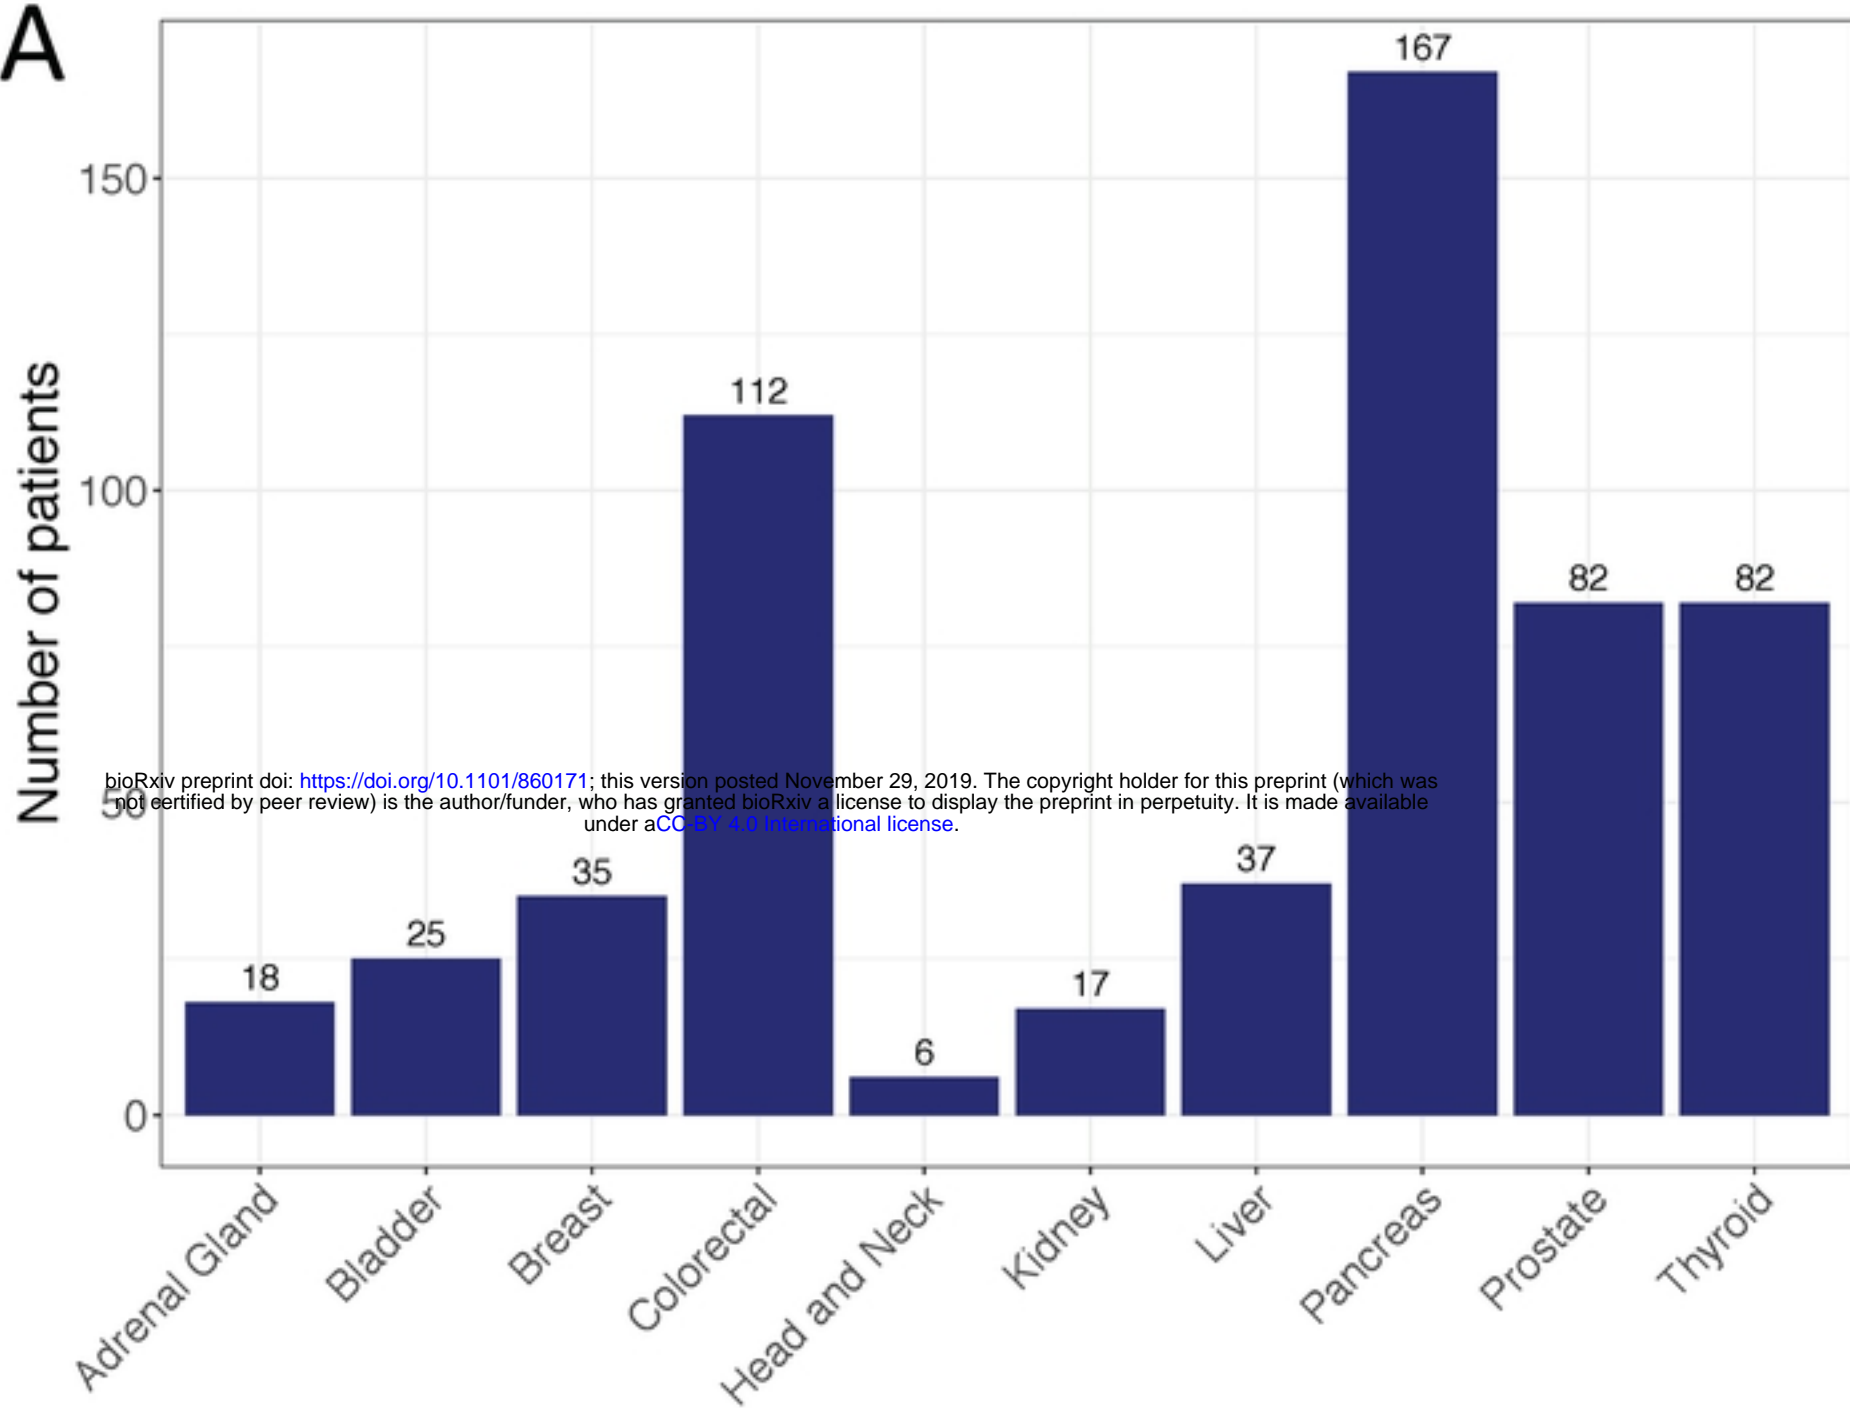

bioRxiv preprint doi: <https://doi.org/10.1101/860171>; this version posted November 29, 2019. The copyright holder for this preprint (which was not certified by peer review) is the author/funder, who has granted bioRxiv a license to display the preprint in perpetuity. It is made available under aCC-BY 4.0 International license.

## B

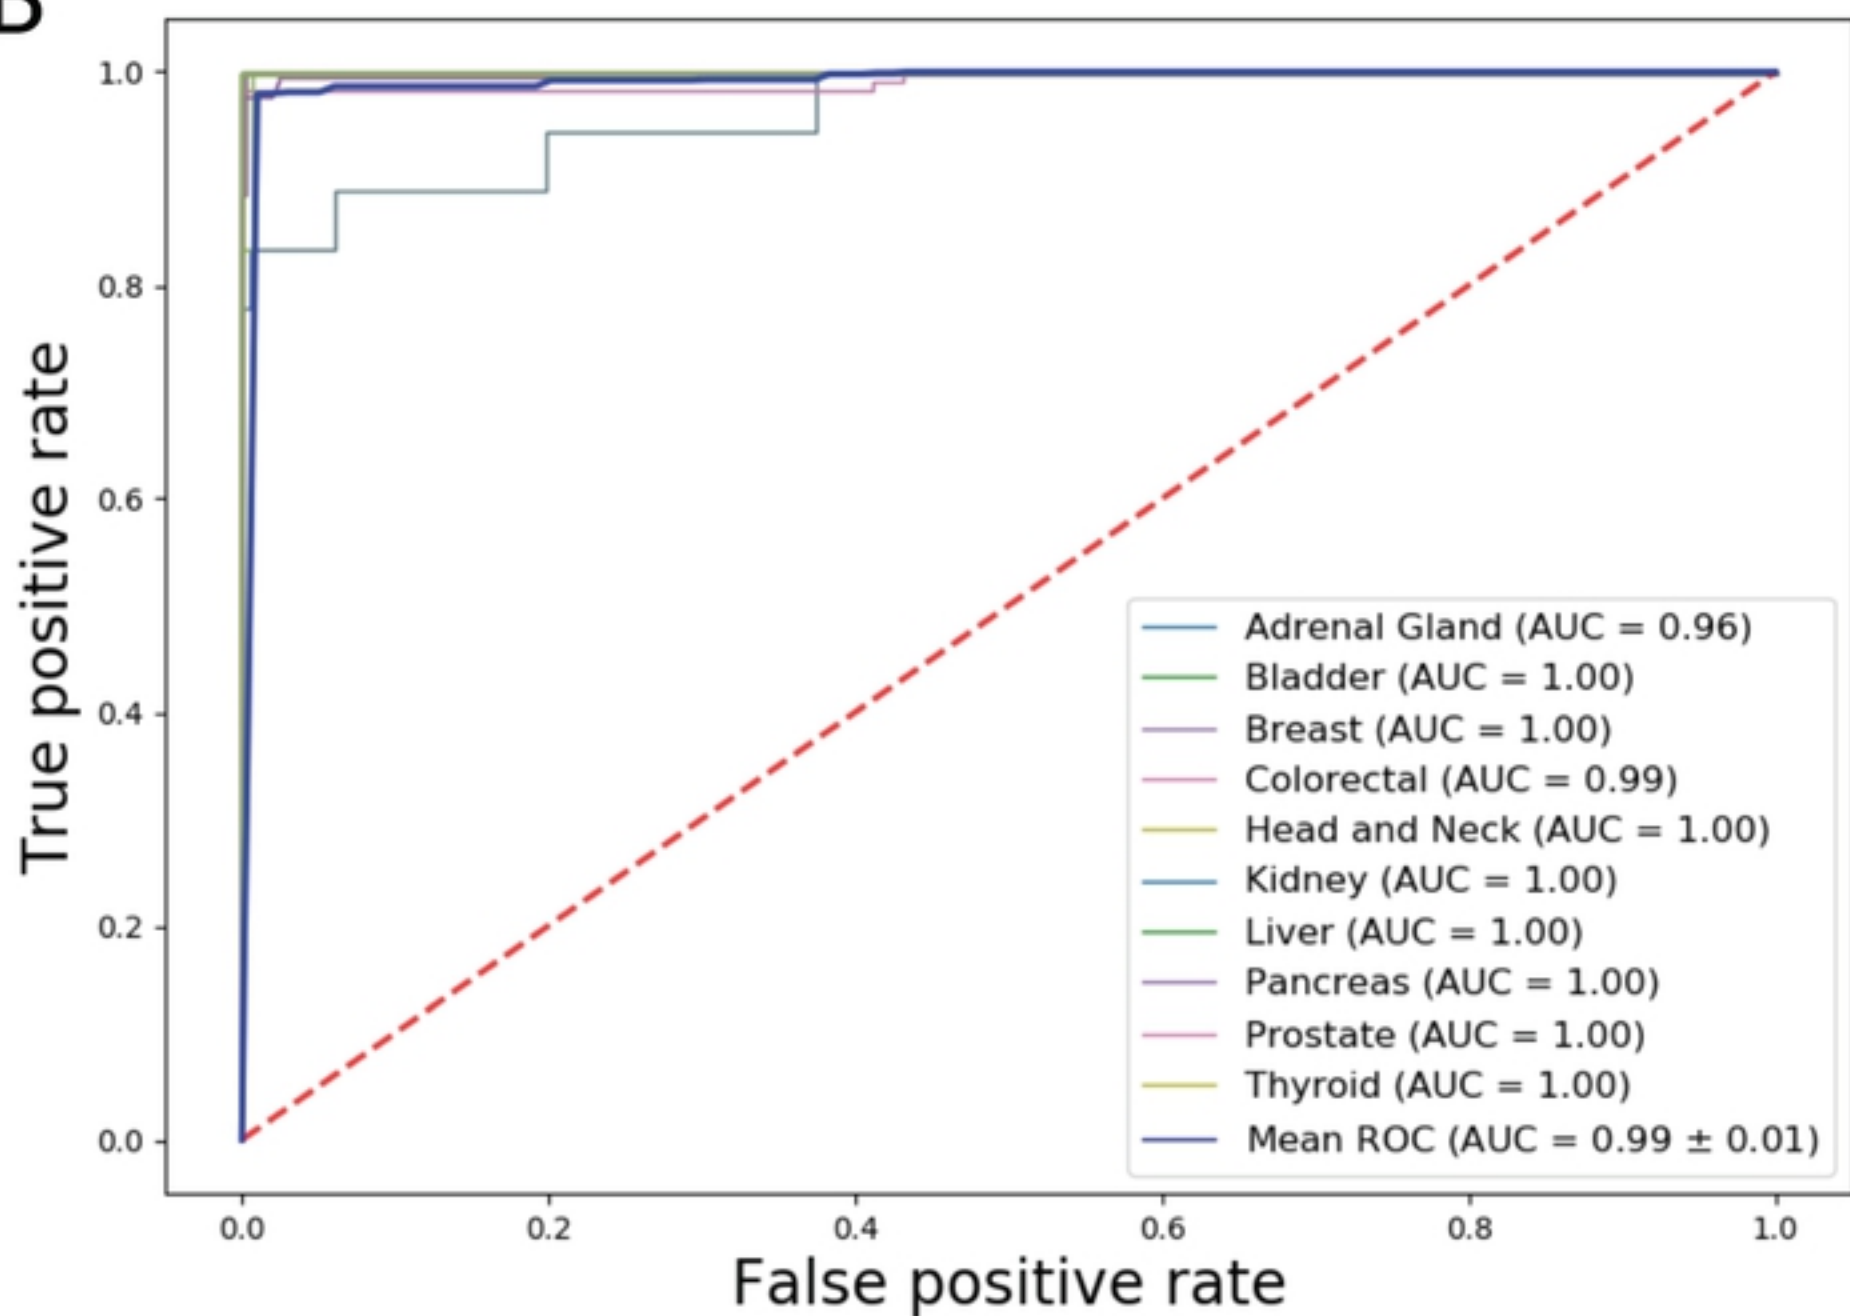

Source: https://www.biorxiv.org/content/10.1101/860171v1.full.pdf
